# Supplementary material for: Novel Transcription Factor Variants through RNA-Sequencing: The Importance of Being “Alternative”
Source: MDPI journal article supplement (doi:10.3390/ijms16011755), 2015-01-13
Supplement: s1 [file s1]

# SATB1 protein alignment

|           |                                                               |     |
|-----------|---------------------------------------------------------------|-----|
| SATB1     | MDHLNEATQGKEHSEMSNNVSDPKGPPAKIARLEQNGSP                       | 60  |
| SATB1_new | -----                                                         |     |
|           | -----                                                         |     |
| SATB1     | GHLMKTNLRKGTMLPVFCVVEHYENAIEYDCKEEHAEFVLVRKDMLFNQLIEMALLSLGY  | 120 |
| SATB1_new | -----MLPVFCVVEHYENAIEYDCKEEHAEFVLVRKDMLFNQLIEMALLSLGY         | 48  |
|           | *****                                                         |     |
| SATB1     | SHSSAAQAKGLIQVGKWNPVPLSYVTDAPDATVADMLQDVYHVVTLKIQLHSCPKELEDLP | 180 |
| SATB1_new | SHSSAAQAKGLIQVGKWNPVPLSYVTDAPDATVADMLQDVYHVVTLKIQLHSCPKELEDLP | 108 |
|           | *****                                                         |     |
| SATB1     | PEQWSHTTVRNALKDLLKDMNQSSLAKECPLSQSMISSIVNSTYYANVSAAKCQEFGRWY  | 240 |
| SATB1_new | PEQWSHTTVRNALKDLLKDMNQSSLAKECPLSQSMISSIVNSTYYANVSAAKCQEFGRWY  | 168 |
|           | *****                                                         |     |
| SATB1     | KHFKKTKDMMVEMDSLSELSQQGANHVNFQQPVPGNTAEQPPSPAQLSHGSQPSVRTPL   | 300 |
| SATB1_new | KHFKKTKDMMVEMDSLSELSQQGANHVNFQQPVPGNTAEQPPSPAQLSHGSQPSVRTPL   | 228 |
|           | *****                                                         |     |
| SATB1     | PNLHPGLVSTPISPQLVNQQQLVMAQLLNQQYAVNRLLAQQSLNQQYLNHPPPVSRSMNKP | 360 |
| SATB1_new | PNLHPGLVSTPISPQLVNQQQLVMAQLLNQQYAVNRLLAQQSLNQQYLNHPPPVSRSMNKP | 288 |
|           | *****                                                         |     |
| SATB1     | LEQQVSTNTEVSSEIYQWVRDELKRAGISQAVFARVAFNRTQGLLSEILRKEEDPKTASQ  | 420 |
| SATB1_new | LEQQVSTNTEVSSEIYQWVRDELKRAGISQAVFARVAFNRTQGLLSEILRKEEDPKTASQ  | 348 |
|           | *****                                                         |     |
| SATB1     | SLLVNLRAMQNFLQLPEAERDRIYQDERERSLNAASAMGPAPLISTPPSRPPQVKTATIA  | 480 |
| SATB1_new | SLLVNLRAMQNFLQLPEAERDRIYQDERERSLNAASAMGPAPLISTPPSRPPQVKTATIA  | 408 |
|           | *****                                                         |     |
| SATB1     | TERNGKPENNTMNINASIYDEIQQEMKRAKVSQALFAKVAATKSQGWLCELLRWKEDPSP  | 540 |
| SATB1_new | TERNGKPENNTMNINASIYDEIQQEMKRAKVSQALFAKVAATKSQGWLCELLRWKEDPSP  | 468 |
|           | *****                                                         |     |
| SATB1     | ENRTLWENLSMIRRFSLPQPERDAIYEQESNAVHHGDRPPHIIHVPAEQIQQQQQQQQ    | 600 |
| SATB1_new | ENRTLWENLSMIRRFSLPQPERDAIYEQESNAVHHGDRPPHIIHVPAEQIQQQQQQQQ    | 528 |
|           | *****                                                         |     |
| SATB1     | QQQQQQQAPPPPQPQQQPQTGPRLP RPQPTVASPAESDEENRQKTRPRTKISVEALGILQ | 660 |
| SATB1_new | QQQQQQQAPPPPQPQQQPQTGPRLP RPQPTVASPAESDEENRQKTRPRTKISVEALGILQ | 588 |
|           | *****                                                         |     |
| SATB1     | SFIQDVGLYPDEEAIQTLSAQLDLPKYTIKFFQNQRYYLKHGKLDNSGLEVDVAEYK     | 720 |
| SATB1_new | SFIQDVGLYPDEEAIQTLSAQLDLPKYTIKFFQNQRYYLKHGKLDNSGLEVDVAEYK     | 648 |
|           | *****                                                         |     |
| SATB1     | EEELLKDLEESVQDKNTNTLFSVKLEEELSVEGNTDINTDLKD                   | 763 |
| SATB1_new | EEELLKDLEESVQDKNTNTLFSVKLEEELSVEGNTDINTDLKD                   | 691 |
|           | *****                                                         |     |

# ELF2 protein alignment

|          |                                                                |     |
|----------|----------------------------------------------------------------|-----|
| ELF2     | MTSAVVDSGGTILELSSNGVENQEESEKVSEYPVIVPEVPSARLEQGYAAQVLVYDDDET   | 60  |
| ELF2_new | -----                                                          |     |
| ELF2     | YMQDVAAEEQEVETENVETVEASVHSSNAHCTDKTIEAAEALLHMESPTCLRDSRSPVEV   | 120 |
| ELF2_new | -----MESPTCLRDSRS----                                          | 12  |
|          | *****                                                          |     |
| ELF2     | FVPPCVSTPEFIHAAMRPDVITETVVEVSTEESEPMDTSPIPTSPDSHEPMKKKKVGRKP   | 180 |
| ELF2_new | -----PEFIHAAMRPDVITETVVEVSTEESEPMDTSPIPTSPDSHEPMKKKKVGRKP      | 64  |
|          | *****                                                          |     |
| ELF2     | KTQQSPIISNGSPELGIKKKPREGKGNTTYLWEFLDLLQDKNTCPRIKWTQREKGIFKL    | 240 |
| ELF2_new | KTQQSPIISNGSPELGIKKKPREGKGNTTYLWEFLDLLQDKNTCPRIKWTQREKGIFKL    | 124 |
|          | *****                                                          |     |
| ELF2     | VDSKAVSKLWGKHKNKPD MN YETMGRALRYYYQRGILAKVEGQRLVYQFKDMPKNIVVID | 300 |
| ELF2_new | VDSKAVSKLWGKHKNKPD MN YETMGRALRYYYQRGILAKVEGQRLVYQFKDMPKNIVVID | 184 |
|          | *****                                                          |     |
| ELF2     | DDKSETCNEDLAGTTDEKSLERVSLSAESLLKAASSVRSGKNSSPINC SRAEKGVARVVN  | 360 |
| ELF2_new | DDKSETCNEDLAGTTDEKSLERVSLSAESLLKAASSVRSGKNSSPINC SRAEKGVARVVN  | 244 |
|          | *****                                                          |     |
| ELF2     | ITSPGHDASSRSPTTTASVSATAAPRTVRVAMQVPVVM TSLGQKISTVAVQSVNAGAPLI  | 420 |
| ELF2_new | ITSPGHDASSRSPTTTASVSATAAPRTVRVAMQVPVVM TSLGQKISTVAVQSVNAGAPLI  | 304 |
|          | *****                                                          |     |
| ELF2     | TSTSPTTATSPKVVIQTIPTVMPASTENGDKITMQPAKIIITIPATQLAQCQLQTKSNLTG  | 480 |
| ELF2_new | TSTSPTTATSPKVVIQTIPTVMPASTENGDKITMQPAKIIITIPATQLAQCQLQTKSNLTG  | 364 |
|          | *****                                                          |     |
| ELF2     | SGSINIVGTPLAVRALTPV SIAHGTPVMRLSMPTQQASGQTPPRVISAVIKGPEVKSEAV  | 540 |
| ELF2_new | SGSINIVGTPLAVRALTPV SIAHGTPVMRLSMPTQQASGQTPPRVISAVIKGPEVKSEAV  | 424 |
|          | *****                                                          |     |
| ELF2     | AKKQEHVDVKTLQLVEEKPADGNKTVTHV VVSAPS AIALPVTMKTEGLVTCEK        | 593 |
| ELF2_new | AKKQEHVDVKTLQLVEEKPADGNKTVTHV VVSAPS AIALPVTMKTEGLVTCEK        | 477 |
|          | *****                                                          |     |

■ Transactivation Domain

# SP140L protein alignment

|            |                                                              |       |
|------------|--------------------------------------------------------------|-------|
| SP140L     | MAGGGSDLSTRGLNGGVSQVANEMNHLPAHSQSLQRLFTEDQDVDEGLVYDTVFKHFKRH | 60    |
| SP140L_new | MAGGGSDLSTR-----LFTEDQDVDEGLVYDTVFKHFKRH                     | 35    |
|            | *****                                                        | ***** |
| SP140L     | KLEISNAIKKTFFPLEGLRDRELITNKMFEDESDSCRNLVPVQRVVYNVLSELEKTFNLS | 120   |
| SP140L_new | KLEISNAIKKTFFPLEGLRDRELITNKMFEDESDSCRNLVPVQRVVYNVLSELEKTFNLS | 95    |
|            | *****                                                        |       |
| SP140L     | VLEALFSEVNMQEYPDLIHIYKSFKNAIQDKLSFQESDRKEREERPDIKLSLKQGEVPES | 180   |
| SP140L_new | VLEALFSEVNMQEYPDLIHIYKSFKNAIQDKLSFQESDRKEREERPDIKLSLKQGEVPES | 155   |
|            | *****                                                        |       |
| SP140L     | PEARKESEDQACGKMDTVDIANNSTLGKPKRKRKKKGHWGSRMGTRTQKNNQQNDNSKAD | 240   |
| SP140L_new | PEARKESEDQACGKMDTVDIANNSTLGKPKRKRKKKGHWGSRMGTRTQKNNQQNDNSKAD | 215   |
|            | *****                                                        |       |
| SP140L     | GQLVSSEKKANMNLKDLSKIRGRKRGKPGTHFTQSDRAPQKRVRSRASRKHKDETVDFQA | 300   |
| SP140L_new | GQLVSSEKKANMNLKDLSKIRGRKRGKPGTHFTQSDRAPQKRVRSRASRKHKDETVDFQA | 275   |
|            | *****                                                        |       |
| SP140L     | PLLPVTCGGVKGILHKEKLEQGTAKCIQTEDGKWFTPMEFEIKGGYARSKNWRLSVRCG  | 360   |
| SP140L_new | PLLPVTCGGVKGILHKEKLEQGTAKCIQTEDGKWFTPMEFEIKGGYARSKNWRLSVRCG  | 335   |
|            | *****                                                        |       |
| SP140L     | GWPLRRLMEEGSLPNPPRIYYRNKKRILKSQNNSSVDPCMRNLDECEVCRDGGELFCCDT | 420   |
| SP140L_new | GWPLRRLMEEGSLPNPPRIYYRNKKRILKSQNNSSVDPCMRNLDECEVCRDGGELFCCDT | 395   |
|            | *****                                                        |       |
| SP140L     | CSRVFHEDCHIPPVESEKTPWNCIFCRMKESPGSQCCQSEVLERQMCPEEQLKCEFL    | 480   |
| SP140L_new | CSRVFHEDCHIPPVESEKTPWNCIFCRMKESPGSQCCQSEVLERQMCPEEQLKCEFL    | 455   |
|            | *****                                                        |       |
| SP140L     | LKVYCCSESSFFAKIPYYYYIREACQGLKEPMWLDKIKKRLNEHGYPQVEGFVQDMRLIF | 540   |
| SP140L_new | LKVYCCSESSFFAKIPYYYYIREACQGLKEPMWLDKIKKRLNEHGYPQVEGFVQDMRLIF | 515   |
|            | *****                                                        |       |
| SP140L     | QNHASYKYKDFGQMGLRLEAEFEKDFKEVFQAIQETNGNS                     | 580   |
| SP140L_new | QNHASYKYKDFGQMGLRLEAEFEKDFKEVFQAIQETNGNS                     | 555   |
|            | *****                                                        |       |



# ARID5B protein alignment

|            |                                                               |     |
|------------|---------------------------------------------------------------|-----|
| ARID5B     | MEPNSLQWVGSPCGLHGPIFYKAFQFHLEGKPRILSLGDFFFVRCTPKDPICIAELQLL   | 60  |
| ARID5B_new | MEPNSLQWVGSPCGLHGPIFYKAFQFHLEGKPRILSLGDFFFVRCTPKDPICIAELQLL   | 60  |
|            | *****                                                         |     |
| ARID5B     | WEERTSRQLLSSSKLYFLPEDTPQGRNSDHGEDEVIAVSEKVIKLEDLVKQVHSDFSKW   | 120 |
| ARID5B_new | WEERTSRQLLSSSKLYFLPEDTPQGRNSDHGEDEVIAVSEKVIKLEDLVKQVHSDFSKW   | 120 |
|            | *****                                                         |     |
| ARID5B     | RCGFHAGPVKTEALGRNGQKEALLKYRQSTLNSGLNFKDVLKEKADLGEDEEETNVIVLS  | 180 |
| ARID5B_new | RCGFHAGPVKTEALGRNGQKEALLKYRQSTLNSGLNFKDVLKEKADL-----          | 167 |
|            | *****                                                         |     |
| ARID5B     | YPQYCRYRSMKRIQDKPSSILTDQFALALGGIAVVSARNPQILYCRDTFDHPTLIENESI  | 240 |
| ARID5B_new | -----                                                         |     |
| ARID5B     | CDEFAPNLKGRPRKKKPCPQRRDSFSGVKDSNNNSDGKAVAKVKCEARSALTKPKNNHNC  | 300 |
| ARID5B_new | ---APNLKGRPRKKKPCPQRRDSFSGVKDSNNNSDGKAVAKVKCEARSALTKPKNNHNC   | 223 |
|            | *****                                                         |     |
| ARID5B     | KKVSNEEKPKVAIGEEGRADEQAFVLALYKMKERKTPIERIPYLGFQKQINLWTFQAAQ   | 360 |
| ARID5B_new | KKVSNEEKPKVAIGEEGRADEQAFVLALYKMKERKTPIERIPYLGFQKQINLWTFQAAQ   | 283 |
|            | *****                                                         |     |
| ARID5B     | KLGGYETITARRQWKHIYDELGGNPGSTSAATCTRRHYERLILPYERFIKGEEDKPLPPI  | 420 |
| ARID5B_new | KLGGYETITARRQWKHIYDELGGNPGSTSAATCTRRHYERLILPYERFIKGEEDKPLPPI  | 343 |
|            | *****                                                         |     |
| ARID5B     | KPRKQENSSQENENKTKVSGTKRIKHEIPKSKKEKENAPKPQDAAEVSSEQEKEQETLIS  | 480 |
| ARID5B_new | KPRKQENSSQENENKTKVSGTKRIKHEIPKSKKEKENAPKPQDAAEVSSEQEKEQETLIS  | 403 |
|            | *****                                                         |     |
| ARID5B     | QKSIPEPLPAADMKKKIEGYQEFSAPKLASRVDPEKDNETDQGSNSEKVAEEAGEKGPTP  | 540 |
| ARID5B_new | QKSIPEPLPAADMKKKIEGYQEFSAPKLASRVDPEKDNETDQGSNSEKVAEEAGEKGPTP  | 463 |
|            | *****                                                         |     |
| ARID5B     | PLPSAPLAPEKDSALVPGASKQPLTSPSALVDSKQESKLCCFTESPESEPEASFPSPPT   | 600 |
| ARID5B_new | PLPSAPLAPEKDSALVPGASKQPLTSPSALVDSKQESKLCCFTESPESEPEASFPSPPT   | 523 |
|            | *****                                                         |     |
| ARID5B     | TQPPLANQNETEDDKLPAMADYIANCTVKVDQLGSDDIHNALKQTPKVLVVQSFD MFKDK | 660 |
| ARID5B_new | TQPPLANQNETEDDKLPAMADYIANCTVKVDQLGSDDIHNALKQTPKVLVVQSFD MFKDK | 583 |
|            | *****                                                         |     |
| ARID5B     | DLTGPMNENHGLNYTPLLYSRGNPGIMSPAKKKLLSQVSGASLSSSYPYGSPPLISKK    | 720 |
| ARID5B_new | DLTGPMNENHGLNYTPLLYSRGNPGIMSPAKKKLLSQVSGASLSSSYPYGSPPLISKK    | 643 |
|            | *****                                                         |     |

|            |                                                               |      |
|------------|---------------------------------------------------------------|------|
| ARID5B     | KLIARDDLCSSLSQTHHGQSTDHMAVSRPSVIQHVQSFRSKPSEERKTINDIFKHEKLSR  | 780  |
| ARID5B_new | KLIARDDLCSSLSQTHHGQSTDHMAVSRPSVIQHVQSFRSKPSEERKTINDIFKHEKLSR  | 703  |
|            | *****                                                         |      |
| ARID5B     | SDPHRCFSFSKHHLNPLADSYVLKQEIQEGKDKLLEKRALPHSHMPSFLADFYSSPHLHSL | 840  |
| ARID5B_new | SDPHRCFSFSKHHLNPLADSYVLKQEIQEGKDKLLEKRALPHSHMPSFLADFYSSPHLHSL | 763  |
|            | *****                                                         |      |
| ARID5B     | YRHTEHHLHNEQTSKYPSRDMYRESENSSFPSHRHQEKLHVNYLTSLHLQDKKSAAAEAP  | 900  |
| ARID5B_new | YRHTEHHLHNEQTSKYPSRDMYRESENSSFPSHRHQEKLHVNYLTSLHLQDKKSAAAEAP  | 823  |
|            | *****                                                         |      |
| ARID5B     | TDDQPTDLSLPKNPHKPTGKVLGLAHSTTGPQESKGISQFQVLGSQSRDCHPKACRVSPM  | 960  |
| ARID5B_new | TDDQPTDLSLPKNPHKPTGKVLGLAHSTTGPQESKGISQFQVLGSQSRDCHPKACRVSPM  | 883  |
|            | *****                                                         |      |
| ARID5B     | TMSGPKKYPESLSRSGKPHHVRLNFRKMEGMVHPILHRKMSPQNIGAARPIKRSLEDLD   | 1020 |
| ARID5B_new | TMSGPKKYPESLSRSGKPHHVRLNFRKMEGMVHPILHRKMSPQNIGAARPIKRSLEDLD   | 943  |
|            | *****                                                         |      |
| ARID5B     | LVIAGKKARAVSPLDPSKEVSGKEKASEQESEGSKAAHGGHSGGGSEG HKLPLSSPIFPG | 1080 |
| ARID5B_new | LVIAGKKARAVSPLDPSKEVSGKEKASEQESEGSKAAHGGHSGGGSEG HKLPLSSPIFPG | 1003 |
|            | *****                                                         |      |
| ARID5B     | LYSGSLCNSGLNSRLPAGYSHSLQYLKNQTVLSPLMQPLAFHSLVMQRGIFTSPTNSQQL  | 1140 |
| ARID5B_new | LYSGSLCNSGLNSRLPAGYSHSLQYLKNQTVLSPLMQPLAFHSLVMQRGIFTSPTNSQQL  | 1063 |
|            | *****                                                         |      |
| ARID5B     | YRH LAAATPVGSSYGDLLHNSIYPLAAINPQA AFPSSQLSSVHPSTKL            | 1188 |
| ARID5B_new | YRH LAAATPVGSSYGDLLHNSIYPLAAINPQA AFPSSQLSSVHPSTKL            | 1111 |
|            | *****                                                         |      |

# NCOA2 protein alignment

|           |                                                                       |     |
|-----------|-----------------------------------------------------------------------|-----|
| NCOA2     | MSGMGENTS DPSRAET RKRKECPDQLGPSPKRNTEKRNREQENKYIEELAELIFANFNDI        | 60  |
| NCOA2_new | MSGMGENTS DPSRAET RKRKECPDQLGPSPKRNTEKRNREQENKYIEELAELIFANFNDI        | 60  |
| *****     |                                                                       |     |
| NCOA2     | DNFNFKPDKCAILKETVKQIRQIKEQEKA AAAANIDEVQKSDVSSTGQGVIDKDALGPMML        | 120 |
| NCOA2_new | DNFNFKPDKCAILKETVKQIRQIKEQEKA AAAANIDEVQKSDVSSTGQGVIDKDALGPMML        | 120 |
| *****     |                                                                       |     |
| NCOA2     | EALD GFFV VV NLEGNV V FVSENV TQYLRYNQEELMNKSVYSILHVG DHT E FVKNLLPKSI | 180 |
| NCOA2_new | EALD GFFV VV NLEGNV V FVSENV TQYLRYNQEELMNKSVYSILHVG DHT E FVKNLLPKSI | 180 |
| *****     |                                                                       |     |
| NCOA2     | VNGGSWSGEPPRRNSHTFNC RMLVKPLPDSEEEGH DNQEAHQKYETMQCFAVSQPKSIKE        | 240 |
| NCOA2_new | VNGGSWSGEPPRRNSHTFNC RMLVKPLPDSEEEGH DNQEAHQKYETMQCFAVSQPKSIKE        | 240 |
| *****     |                                                                       |     |
| NCOA2     | EGEDLQ SCLICVARRVPMKERPVLP SSEFTTRQDLQ GKITS LDTSTMRAAMKPGWEDLV       | 300 |
| NCOA2_new | EGEDLQ SCLICVARRVPMKERPVLP SSEFTTRQDLQ GKITS LDTSTMRAAMKPGWEDLV       | 300 |
| *****     |                                                                       |     |
| NCOA2     | RRCIQKFHAQH EGESVS YAKRHHHEVLRQGLAFS QIYRFS LSDGTLVAAQTKSKLIRSQT      | 360 |
| NCOA2_new | RRCIQKFHAQH EGESVS YAKRHHHEVLRQGLAFS QIYRFS LSDGTLVAAQTKSKLIRSQT      | 360 |
| *****     |                                                                       |     |
| NCOA2     | TNEPQLVISLHMLHREQNVCMNPDLTGQTMGKPLNPIS SNSPA HQALCSGNPGQDMTSL         | 420 |
| NCOA2_new | TNEPQLVISLHMLHREQNVCMNPDLTGQTMGKPLNPIS SNSPA HQALCSGNPGQDMTSL         | 420 |
| *****     |                                                                       |     |
| NCOA2     | SNINF PINGPKEQMGM PMGRFGGSGGMNHVSGMQATTPQGSNYALKMNSPSQSSPGMNPG        | 480 |
| NCOA2_new | SNINF PINGPKEQMGM PMGRFGGSGGMNHVSGMQATTPQGSNYALKMNSPSQSSPGMNPG        | 480 |
| *****     |                                                                       |     |
| NCOA2     | QPTSM LSPRHRMSPGVAGSPRIPPSQFSPAGSLHSPVGVCSSTGNSHSYTNSSLNALQAL         | 540 |
| NCOA2_new | QPTSM LSPRHRMSPGVAGSPRIPPSQFSPAGSLHSPVGVCSSTGNSHSYTNSSLNALQAL         | 540 |
| *****     |                                                                       |     |
| NCOA2     | SEGHGVSLGSSLASPD LKMGNLQNSPVNMNPPPLSKMGS LDKDCFGLYGEPSEGT TGQA        | 600 |
| NCOA2_new | SEGHGVSLGSSLASPD LKMGNLQNSPVNMNPPPLSKMGS LDKDCFGLYGEPSEGT TGQA        | 600 |
| *****     |                                                                       |     |
| NCOA2     | ESSCHPGEQKETNDPNLPPAVSSERADGQSRLHDSKGQTKLLQLLTTKSDQMEPSPLASS          | 660 |
| NCOA2_new | ESSCHPGEQKETNDPNLPPAVSSERADGQSRLHDSKGQTKLLQLLTTKSDQMEPSPLASS          | 660 |
| *****     |                                                                       |     |
| NCOA2     | LSDTNKDSTGSLPGSGSTHGTS LKEKHKILHRL LQDSSSPVDLAKLTAEATGKDLSQESS        | 720 |
| NCOA2_new | LSDTNKDSTGSLPGSGSTHGTS LKEKHKILHRL LQDSSSPVDLAKLTAEATGKDLSQESS        | 720 |
| *****     |                                                                       |     |
| NCOA2     | STAPGSEVTIKQEPVSPKKKENALLRYLLDKDDTKDIGLPEITPKLERLDSKTDPASNTK          | 780 |
| NCOA2_new | STAPGSEVTIKQEPVSPKKKENALLRYLLDKDDTKDIGLPEITPKLERLDSKTDPASNTK          | 780 |
| *****     |                                                                       |     |



|           |                                                               |      |
|-----------|---------------------------------------------------------------|------|
| NCOA2     | LIAMKTEKEEMSFEPGDQPGSELDNLEEILDDLQNSQLPQLFPDTRPGAPAGSVDKQAI I | 840  |
| NCOA2_new | LIAMKTEKEEMSFEPGDQE-----                                      | 799  |
|           | *****                                                         |      |
| NCOA2     | NDLMQLTAENSPVTPVGAQKTALRISQSTFNNPRPGQLGRLLPNQNLPLDITLQSPTGAG  | 900  |
| NCOA2_new | -----                                                         |      |
| NCOA2     | PFPPIRNSSPYSVIPQPGMMGNQGMIGNQGNLGNSSTGMIGNSASRPTMPSGEWAPQSSA  | 960  |
| NCOA2_new | -----                                                         |      |
| NCOA2     | VRVTCAATTSAMNRPVQGGMIRNPAASIPMRPSSQPGQRQTLQSQVMNIGPSELEMNMG   | 1020 |
| NCOA2_new | -----                                                         |      |
| NCOA2     | PQYSQQQAPPNQ TAPWPESILPIDQASFASQNRQPFQSSPDDLCPHPAAESPSDEGALL  | 1080 |
| NCOA2_new | -----                                                         |      |
| NCOA2     | DQLYLALRNFDGLEEIDRALGIPELVSQSQA VDPEQFSSQDSNIMLEQKAPVFPQQYASQ | 1140 |
| NCOA2_new | -----                                                         |      |
| NCOA2     | AQMAQGSYSQPMQDPNFHTMGQRPSYATLRMQPRPGLRPTGLVQNQPNQLRLQLQHRLQAQ | 1200 |
| NCOA2_new | -----                                                         |      |
| NCOA2     | QNRQPLMNQISNVSNVNLTLRPGVPTQAPINAQMLAQ RQREILNQHLRQRQMHQQQQVQQ | 1260 |
| NCOA2_new | -----                                                         |      |
| NCOA2     | RTLMMRGQGLNMTPSMVAPSGMPATMSNPRI PQANAQQFPFPPNYGISQQPDPGFTGATT | 1320 |
| NCOA2_new | -----                                                         |      |
| NCOA2     | PQSPLMSPRMAHTQSPMMQQSQANPAYQAPSDINGWAQGNMGGNSMFSQQSPPHFGQQAN  | 1380 |
| NCOA2_new | -----                                                         |      |
| NCOA2     | TSMYSNNMNINVS MATNTGGMSSMNQMTGQISMTSVTSVPTSGLSMSGPEQVNDPALRGG | 1440 |
| NCOA2_new | -----                                                         |      |
| NCOA2     | NLFPNQLPGMDMIKQEGDTTRKYC                                      | 1464 |
| NCOA2_new | -----                                                         |      |

-  LXXLL motif 4
-  LLXXLXXXL motif
-  Poly-Gln

# ZNF266 protein alignment

|            |                                                               |     |
|------------|---------------------------------------------------------------|-----|
| ZNF266     | -----                                                         |     |
| ZNF266_new | MAATDLSYGLYRDPVCLQEKTEVERVVADCLTNCYQDSVTFDDLAVDFTPEEWTLLDPTQ  | 60  |
| ZNF266     | -----MLENYKNLATVGYQLFKPSLISWLEQEEERTVQRGDFQASEWKVQLKTKEAL     | 53  |
| ZNF266_new | RNLYRDVMLENYKNLATVGYQLFKPSLISWLEQEEERTVQRGDFQASEWKVQLKTKEAL   | 120 |
|            | *****                                                         |     |
| ZNF266     | QQDVLGEPTSSGIQMIGSHNGGEVSDVKQCGDVSSEHSCLKTHVRTQNSSENTFECYLYGV | 113 |
| ZNF266_new | QQDVLGEPTSSGIQMIGSHNGGEVSDVKQCGDVSSEHSCLKTHVRTQNSSENTFECYLYGV | 180 |
|            | *****                                                         |     |
| ZNF266     | DFLTLHKKTSTGEQRSVFSQCGKAFSLNPDVVCQRTCTGEKAFDCSDSGKSFINHSHLQG  | 173 |
| ZNF266_new | DFLTLHKKTSTGEQRSVFSQCGKAFSLNPDVVCQRTCTGEKAFDCSDSGKSFINHSHLQG  | 240 |
|            | *****                                                         |     |
| ZNF266     | HLRTHNGESLHEWKECGRGFIHSTD LAVRIQTHRSEKPYKCKEKGKGFYSAYLNIHMGT  | 233 |
| ZNF266_new | HLRTHNGESLHEWKECGRGFIHSTD LAVRIQTHRSEKPYKCKEKGKGFYSAYLNIHMGT  | 300 |
|            | *****                                                         |     |
| ZNF266     | HTGDNPYECKEKGKAFTRSCQLTQHRKTHTGKPYKCKDCGRAFTVSSCLSQHMKIHVGE   | 293 |
| ZNF266_new | HTGDNPYECKEKGKAFTRSCQLTQHRKTHTGKPYKCKDCGRAFTVSSCLSQHMKIHVGE   | 360 |
|            | *****                                                         |     |
| ZNF266     | KPYECKEKGIAFTRSSQLTEHLKTH TAKDPFECKICGKSFRNSSCLSDHFRIHTGIKPYK | 353 |
| ZNF266_new | KPYECKEKGIAFTRSSQLTEHLKTH TAKDPFECKICGKSFRNSSCLSDHFRIHTGIKPYK | 420 |
|            | *****                                                         |     |
| ZNF266     | CKDCGKAFTQNSDLTKHARTHSGERP YECKEKGKAFARSSRLSEHTRTHTGKPFECVKC  | 413 |
| ZNF266_new | CKDCGKAFTQNSDLTKHARTHSGERP YECKEKGKAFARSSRLSEHTRTHTGKPFECVKC  | 480 |
|            | *****                                                         |     |
| ZNF266     | GKAFAISSNLSGHLRIHTGKPFECLECGKAFTHSSSLNNHMRTHSAKKPFTCMECGKAF   | 473 |
| ZNF266_new | GKAFAISSNLSGHLRIHTGKPFECLECGKAFTHSSSLNNHMRTHSAKKPFTCMECGKAF   | 540 |
|            | *****                                                         |     |
| ZNF266     | KFPTCVNLHMRIHTGKPYKCKQCGKSFSYSNSFQLHERHTHTGKPYECKEKGKAFSSSS   | 533 |
| ZNF266_new | KFPTCVNLHMRIHTGKPYKCKQCGKSFSYSNSFQLHERHTHTGKPYECKEKGKAFSSSS   | 600 |
|            | *****                                                         |     |
| ZNF266     | SFRNHERRHADERLSA                                              | 549 |
| ZNF266_new | SFRNHERRHADERLSA                                              | 616 |
|            | *****                                                         |     |
