# Supplementary material for: Novel Transcription Factor Variants through RNA-Sequencing: The Importance of Being “Alternative”
Source: MDPI journal article supplement (doi:10.3390/ijms16011755), 2015-01-13
Supplement: s1 [file s1]

## Supplementary Information

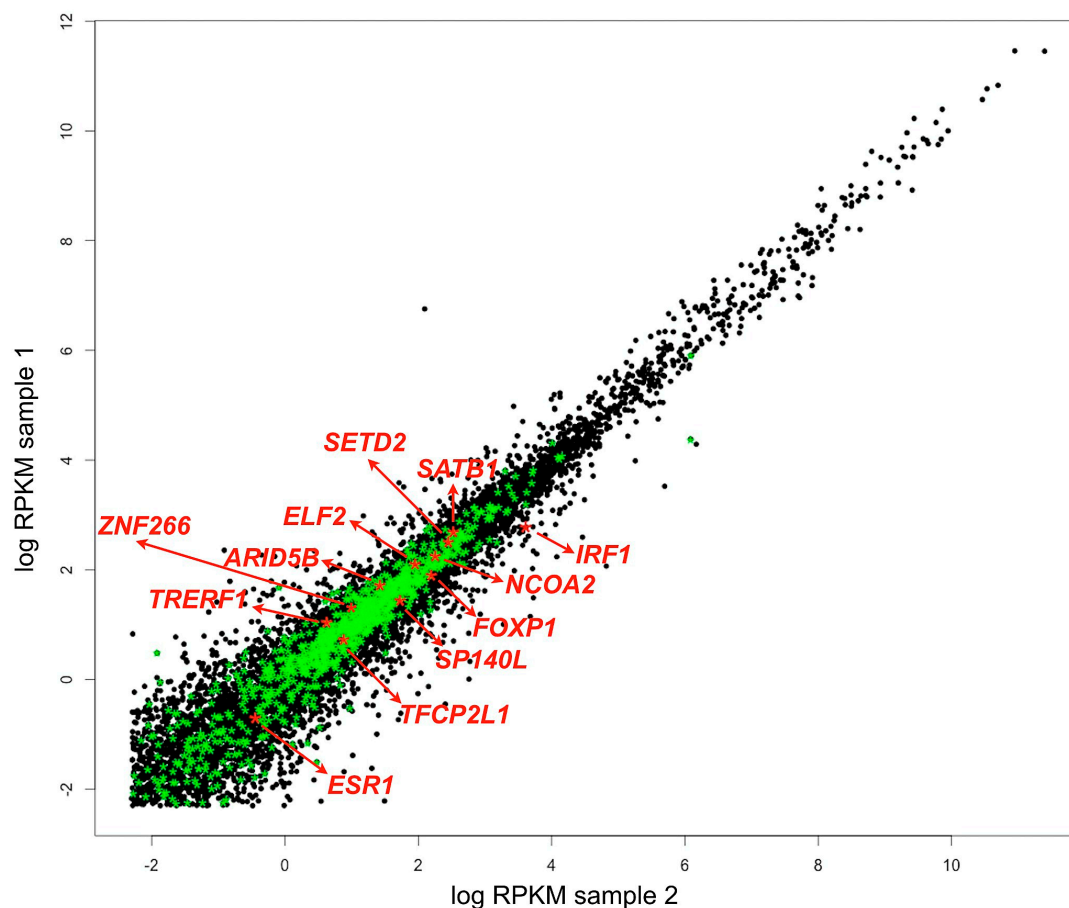

**Figure S1.** Scatter plot of log-transformed gene expression levels between two samples. Genes are indicated with black dots. Green stars represent transcription factors encoding genes and red stars indicate genes with evidence of alternative splicing events.

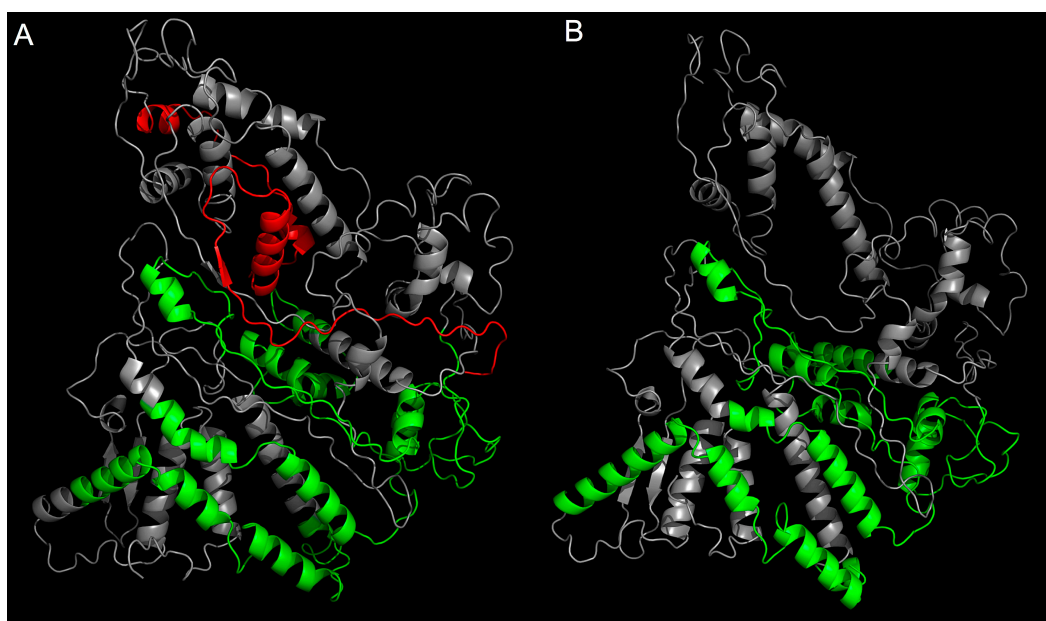

**Figure S2.** Tridimensional structures of annotated (panel A) and novel (panel B) SATB1 isoforms are shown as grey cartoons. Nuclear localization signal and DNA binding domain are highlighted in red and green, respectively.

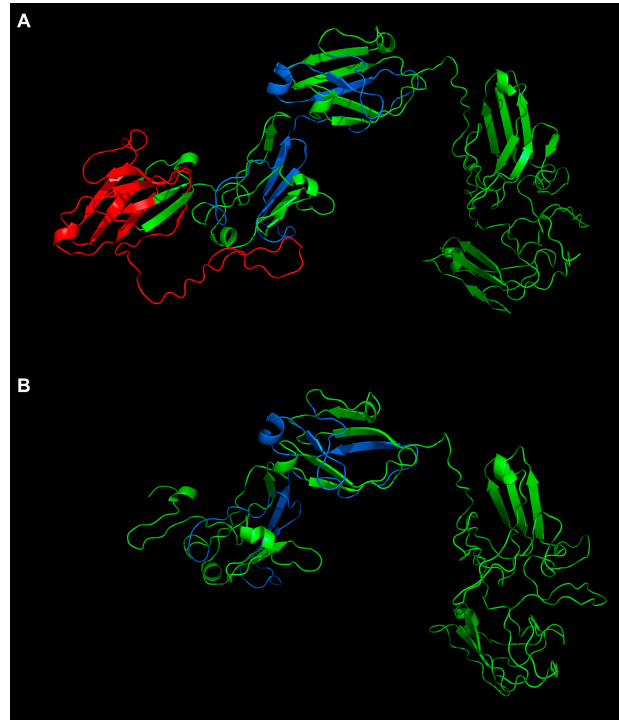

**Figure S3.** Tridimensional structures of annotated (panel **A**) and new (panel **B**) ELF2 isoforms are shown as green cartoons. *N*-terminal domain and the ETS-like domain are highlighted in red and blue, respectively.

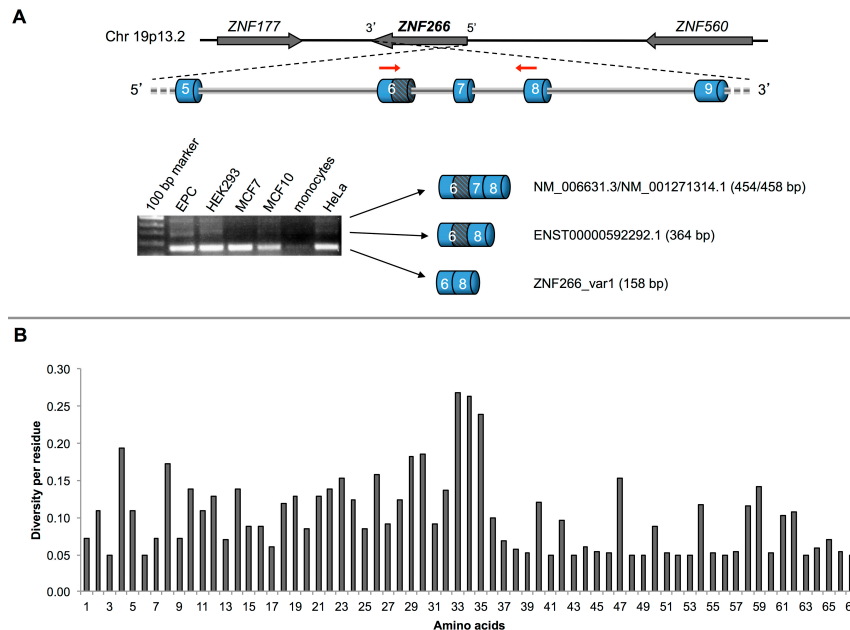

**Figure S4.** Panel **A**: Graphical representation of *ZNF266* transcripts. The genomic region encompassing *ZNF266* gene and the exon/intron structure are shown in the upper part. Red arrows indicate the primers annealing sites. In the lower part, analysis of PCR product by agarose gel electrophoresis in six cell lines/primary cells indicates the presence of three amplicons, schematized in the right part. The lowest PCR product correspond to the new identified *ZNF266* transcript; Panel **B**: Histogram of diversity per residue rate, relative to the additional 67 amino acids in the new *ZNF266* isoform.

**Table S1.** Expression pattern analysis of newly identified TFs transcripts. Relative expression of newly identified transcripts is schematized as ++ (present at high level), + (present), – (absent); “Not expressed” indicates that the corresponding gene is not expressed. EPC: Endothelial Progenitor Cells; HEK293: Human Embryonic Kidney-293 cell line; MCF7: Michigan Cancer Foundation-7 cell line; MCF10: Michigan Cancer Foundation-10 cell line; HeLa: Henrietta Lacks cell line.

| Transcript         | EPC | HEK293 | MCF7 | MCF10         | HeLa | Monocytes     |
|--------------------|-----|--------|------|---------------|------|---------------|
| <i>ZNF266_var1</i> | ++  | ++     | ++   | ++            | ++   | +             |
| <i>SATB1_var1</i>  | +   | ++     | –    | Not expressed | +    | Not expressed |
| <i>SP140L_var1</i> | ++  | +      | +    | +             | +    | +             |
| <i>ARID5B_var1</i> | ++  | ++     | +    | +             | ++   | –             |
| <i>NCOA2_var1</i>  | +   | +      | +    | +             | +    | Not expressed |
| <i>ELF2_var1</i>   | +   | +      | +    | –             | –    | –             |
| <i>ELF2_var2</i>   | ++  | +      | +    | –             | –    | –             |
| <i>IRF1_var1</i>   | +   | +      | +    | +             | +    | +             |
| <i>IRF1_var2</i>   | +   | +      | +    | +             | +    | +             |

**Table S2.** Evolutionary conservation of newly identified TFs transcripts. EST: Expressed Sequence Tag.

| Transcript         | Accession Number | Organism  | Type              |
|--------------------|------------------|-----------|-------------------|
| <i>ZNF266_var1</i> | JV705547         | Macaca    | mRNA from GenBank |
|                    | JV640626         | Macaca    | mRNA from GenBank |
|                    | AK305581         | Pan       | mRNA from GenBank |
|                    | HX641224         | Callitrix | EST               |
|                    | HX654921         | Callitrix | EST               |
|                    | EB529880         | Macaca    | EST               |
|                    | BB625302         | Mus       | EST               |
|                    | BY092133         | Mus       | EST               |
|                    | BY133758         | Mus       | EST               |
|                    | BY726782         | Mus       | EST               |
|                    | CD546656         | Mus       | EST               |
|                    | CN697858         | Mus       | EST               |
|                    | CN702205         | Mus       | EST               |
|                    | CX565991         | Mus       | EST               |
|                    | CB605822         | Rattus    | EST               |
|                    | FN800703         | Rattus    | EST               |
| <i>SATB1_var1</i>  | FS646931         | Sus       | EST               |
| <i>SP140L_var1</i> | HX457795         | Callitrix | EST               |
|                    | HX540006         | Callitrix | EST               |
|                    | HX541471         | Callitrix | EST               |
|                    | HX547835         | Callitrix | EST               |
|                    | HX564060         | Callitrix | EST               |
|                    | HX564780         | Callitrix | EST               |
|                    | HX457795         | Callitrix | EST               |
|                    | BM423272         | Macaca    | EST               |
|                    | DK580521         | Macaca    | EST               |
|                    | DC853200         | Macaca    | EST               |
|                    | CB553659         | Macaca    | EST               |

**Table S2. Cont.**

| <b>Transcript</b>         | <b>Accession Number</b> | <b>Organism</b> | <b>Type</b>       |
|---------------------------|-------------------------|-----------------|-------------------|
| <b><i>ARID5B</i>_var1</b> | /                       | /               | /                 |
| <b><i>NCOA2</i>_var1</b>  | /                       | /               | /                 |
| <b><i>ELF2</i>_var1</b>   | JR403486                | Camelus         | mRNA from GenBank |
| <b><i>ELF2</i>_var2</b>   | JU727093                | Bubalus         | mRNA from GenBank |
|                           | JO618916                | Capra           | mRNA from GenBank |
|                           | JT722928                | Capra           | mRNA from GenBank |
|                           | BC027739                | Mus             | mRNA from GenBank |
|                           | AK200215                | Mus             | mRNA from GenBank |
|                           | FE023941                | Ovis            | EST               |
| <b><i>IRF1</i>_var1</b>   | KA619585                | Bubalus         | mRNA from GenBank |
|                           | JT619617                | Capra           | mRNA from GenBank |
| <b><i>IRF1</i>_var2</b>   | —                       | —               | —                 |
