# Supplementary material
Source: MDPI journal article supplement (https://www.mdpi.com/1422-0067/16/1/1755)
Supplement: s1 [file s1]

Archive with 3 entries (3 files):
- ijms-69556-Supplementary file S2.xlsx
- ijms-69556-Supplementary Information.pdf
- ijms-69556-Supplementary file S1.pdf
