# Supplementary material for: Novel Transcription Factor Variants through RNA-Sequencing: The Importance of Being “Alternative”
Source: MDPI journal article supplement (doi:10.3390/ijms16011755), 2015-01-13
Supplement: s1 [file s1 › ijms-69556-Supplementary file S2.xlsx]

## Sheet: Foglio1
Exposition	Residue	N. of residue	Relative Surface Accessibility - RSA	Z-fit score for RSA prediction		Legend
E	M	1	0.702	-1216			KRAB domain
E	A	2	0.481	-1169			new ZNF motifs
E	A	3	0.423	-1291			annotated ZNF motifs
E	T	4	0.357	-1077
E	D	5	0.584	-1531
B	L	6	0.221	-0.998
E	S	7	0.351	-1531
E	Y	8	0.318	-1407
B	G	9	0.186	-2223
B	L	10	0.164	-1205
E	Y	11	0.368	-1683
E	R	12	0.564	-1418
B	D	13	0.299	-2012
E	P	14	0.333	-1865
E	V	15	0.435	-1469
B	C	16	0.162	-0.345
E	L	17	0.324	-0.368
E	Q	18	0.566	-0.065
E	E	19	0.681	-0.258
E	K	20	0.658	-0.654
E	T	21	0.523	-0.271
E	E	22	0.544	-0.226
E	V	23	0.689	-0.038
E	E	24	0.524	-0.666
E	R	25	0.455	-0.602
B	V	26	0.269	-0.459
B	V	27	0.228	-1106
B	A	28	0.29	-1815
E	D	29	0.393	-1482
B	C	30	0.274	-1596
B	L	31	0.261	-1287
E	T	32	0.397	-1152
B	N	33	0.277	-1335
E	C	34	0.348	-0.51
B	Y	35	0.182	-2039
B	Q	36	0.235	-0.701
B	D	37	0.162	-1519
B	S	38	0.155	0.279
B	V	39	0.026	0.824
B	T	40	0.109	0.746
B	F	41	0.061	0.246
E	D	42	0.332	1303
B	D	43	0.231	-0.461
B	L	44	0.063	0.858
B	A	45	0.084	0.791
B	V	46	0.078	0.798
B	D	47	0.299	0.488
B	F	48	0.059	1181
B	T	49	0.16	1062
E	P	50	0.403	0.788
E	E	51	0.49	0.404
B	E	52	0.097	0.11
B	W	53	0.104	0.793
E	T	54	0.576	1355
E	L	55	0.334	0.252
B	L	56	0.074	1093
E	D	57	0.436	0.774
E	P	58	0.544	0.316
E	T	59	0.347	-0.705
B	Q	60	0.189	-0.437
E	R	61	0.261	1069
E	N	62	0.516	0.901
B	L	63	0.136	0.786
B	Y	64	0.148	0.345
E	R	65	0.274	1084
B	D	66	0.284	-0.109
B	V	67	0.092	0.814
B	M	68	0.106	0.312
B	L	69	0.202	0.151
B	E	70	0.243	-0.532
B	N	71	0.231	-0.591
B	Y	72	0.169	0.233
E	K	73	0.366	-0.148
B	N	74	0.121	-0.69
B	L	75	0.103	0.632
B	A	76	0.123	-0.358
B	T	77	0.181	-1561
B	V	78	0.127	-0.21
B	G	79	0.288	-1656
B	Y	80	0.254	0.311
E	Q	81	0.465	-0.407
B	L	82	0.211	-0.082
E	F	83	0.507	-0.701
E	K	84	0.527	0.468
E	P	85	0.459	-0.636
E	S	86	0.776	-1057
E	L	87	0.348	0.722
E	I	88	0.336	-0.37
E	S	89	0.501	0.045
E	W	90	0.374	1538
B	L	91	0.16	-0.114
E	E	92	0.562	-0.365
E	Q	93	0.636	0.321
E	E	94	0.418	-1029
E	E	95	0.714	-0.627
E	S	96	0.563	-0.328
E	R	97	0.439	-0.374
E	T	98	0.334	-1175
E	V	99	0.419	0.052
E	Q	100	0.429	-0.555
E	R	101	0.543	-0.507
E	G	102	0.5	-0.931
E	D	103	0.646	-0.58
E	F	104	0.504	-0.765
E	Q	105	0.456	-0.719
E	A	106	0.546	-0.693
E	S	107	0.481	-1022
E	E	108	0.662	-0.864
E	W	109	0.461	-0.188
E	K	110	0.607	-1057
E	V	111	0.587	-0.762
E	Q	112	0.507	0.144
E	L	113	0.372	-0.549
E	K	114	0.626	-0.266
E	T	115	0.608	0.094
E	K	116	0.601	-0.356
E	E	117	0.572	-0.394
E	L	118	0.501	1168
B	A	119	0.197	-1638
E	L	120	0.465	-0.231
E	Q	121	0.638	0.465
E	Q	122	0.39	-0.631
E	D	123	0.574	-1393
E	V	124	0.572	-0.367
E	L	125	0.38	-0.836
E	G	126	0.417	-1241
E	E	127	0.58	-0.607
E	P	128	0.543	-0.239
E	T	129	0.308	-0.493
E	S	130	0.39	-1532
E	S	131	0.474	-0.708
B	G	132	0.272	-1029
E	I	133	0.446	-0.347
E	Q	134	0.485	0.119
B	M	135	0.282	-0.497
E	I	136	0.405	-0.647
E	G	137	0.418	-0.639
B	S	138	0.288	-0.626
E	H	139	0.309	-0.41
E	N	140	0.476	-0.869
E	G	141	0.602	-1895
E	G	142	0.569	-0.636
E	E	143	0.424	0.367
E	V	144	0.378	-0.806
B	S	145	0.196	0.236
E	D	146	0.589	1030
B	V	147	0.159	-0.934
E	K	148	0.677	0.165
E	Q	149	0.535	0.164
E	C	150	0.299	-0.535
E	G	151	0.425	-0.682
E	D	152	0.494	-0.004
E	V	153	0.398	-0.398
B	S	154	0.133	-0.529
E	S	155	0.527	-0.816
E	E	156	0.491	-0.864
E	H	157	0.511	-0.518
E	S	158	0.373	-1502
E	C	159	0.503	0.31
B	L	160	0.098	-0.3
E	K	161	0.506	0.566
E	T	162	0.489	0.712
B	H	163	0.257	-0.392
E	V	164	0.347	-0.251
E	R	165	0.489	-0.473
B	T	166	0.332	-0.543
B	Q	167	0.26	-0.23
E	N	168	0.411	-1000
E	S	169	0.555	-1474
E	E	170	0.564	-0.343
E	N	171	0.387	0.632
E	T	172	0.362	-0.898
B	F	173	0.23	-0.293
E	E	174	0.611	1347
B	C	175	0.142	-0.491
E	Y	176	0.702	0.362
E	L	177	0.621	0.222
E	Y	178	0.356	-0.455
E	G	179	0.423	-0.796
E	V	180	0.454	0.237
E	D	181	0.361	-0.471
B	F	182	0.175	-0.127
B	L	183	0.197	-0.208
E	T	184	0.489	0.447
E	L	185	0.469	0.842
B	H	186	0.225	-0.273
E	K	187	0.359	-0.106
E	K	188	0.431	-0.286
B	T	189	0.219	0.116
B	S	190	0.194	0.027
E	T	191	0.376	-0.561
E	G	192	0.603	-1863
E	E	193	0.621	-0.153
E	Q	194	0.45	0.555
E	R	195	0.412	-0.537
B	S	196	0.19	0.132
E	V	197	0.63	1504
B	F	198	0.151	-0.584
E	S	199	0.706	0.491
E	Q	200	0.564	0.506
E	C	201	0.306	-0.209
E	G	202	0.426	-0.376
E	K	203	0.431	0.104
B	A	204	0.295	-0.449
B	F	205	0.095	-0.096
E	S	206	0.423	-0.533
E	L	207	0.406	-0.642
E	N	208	0.515	-0.772
E	P	209	0.357	-1876
E	D	210	0.484	-0.921
B	V	211	0.115	-0.183
E	V	212	0.411	0.585
B	C	213	0.272	-0.388
E	Q	214	0.319	-0.135
E	R	215	0.393	-0.441
E	T	216	0.355	-0.364
B	C	217	0.244	-0.042
E	T	218	0.401	-0.788
E	G	219	0.566	-1784
E	E	220	0.503	-0.141
E	K	221	0.465	0.512
E	A	222	0.389	-0.774
B	F	223	0.192	0.21
E	D	224	0.609	1421
B	C	225	0.147	-0.277
E	S	226	0.72	0.59
E	D	227	0.502	0.631
E	S	228	0.304	-0.301
E	G	229	0.436	-0.326
E	K	230	0.394	0.271
B	S	231	0.312	-0.239
B	F	232	0.086	-0.01
E	I	233	0.39	-0.434
E	N	234	0.465	-0.422
E	H	235	0.533	-0.112
B	S	236	0.31	-1336
E	H	237	0.469	0.192
B	L	238	0.093	0.191
E	Q	239	0.462	0.919
E	G	240	0.51	0.999
B	H	241	0.199	0.103
E	L	242	0.322	-0.056
E	R	243	0.389	-0.111
B	T	244	0.258	0.15
B	H	245	0.188	0.198
E	N	246	0.397	-0.344
E	G	247	0.584	-1681
E	E	248	0.543	-0.027
E	S	249	0.44	0.82
E	L	250	0.395	-0.427
B	H	251	0.162	0.469
E	E	252	0.607	1662
B	W	253	0.13	-0.036
E	K	254	0.723	0.951
E	E	255	0.559	1081
B	C	256	0.253	0.084
E	G	257	0.328	0.045
E	R	258	0.428	0.355
E	G	259	0.325	0.153
B	F	260	0.075	-0.467
E	I	261	0.395	-0.311
E	H	262	0.471	-0.286
E	S	263	0.506	-0.218
E	T	264	0.343	-1137
E	D	265	0.46	0.446
B	L	266	0.091	0.458
E	A	267	0.425	0.847
E	V	268	0.492	1278
B	R	269	0.207	-0.074
E	I	270	0.29	0.428
E	Q	271	0.403	-0.064
B	T	272	0.207	0.598
B	H	273	0.195	0.306
E	R	274	0.38	-0.338
E	S	275	0.522	-1638
E	E	276	0.494	0.147
E	K	277	0.443	0.579
E	P	278	0.356	-0.511
B	Y	279	0.171	0.591
E	K	280	0.604	1912
B	C	281	0.102	0.233
E	K	282	0.713	1085
E	E	283	0.547	1262
B	C	284	0.264	0.097
E	G	285	0.404	-0.079
E	K	286	0.367	0.211
B	G	287	0.322	-0.037
B	F	288	0.092	-0.047
E	R	289	0.376	-0.267
E	Y	290	0.43	-0.236
E	S	291	0.489	-0.018
E	A	292	0.367	-1089
E	Y	293	0.442	0.423
B	L	294	0.074	-0.468
E	N	295	0.425	0.978
E	I	296	0.49	1358
B	H	297	0.181	-0.079
B	M	298	0.277	0.31
E	G	299	0.364	-0.263
B	T	300	0.236	0.096
B	H	301	0.161	0.303
E	T	302	0.334	-0.52
E	G	303	0.524	-1851
E	D	304	0.489	-0.01
E	N	305	0.458	0.553
E	P	306	0.377	-0.409
B	Y	307	0.162	0.607
E	E	308	0.557	1823
B	C	309	0.081	0.26
E	K	310	0.706	1163
E	E	311	0.53	1286
B	C	312	0.261	0.057
E	G	313	0.385	-0.201
E	K	314	0.373	0.311
B	A	315	0.308	0.048
B	F	316	0.088	0.042
E	T	317	0.343	-0.276
E	R	318	0.439	-0.144
E	S	319	0.469	0.065
E	C	320	0.364	-1042
E	Q	321	0.401	0.522
B	L	322	0.074	-0.083
E	T	323	0.441	1387
E	Q	324	0.506	1609
B	H	325	0.166	0.08
E	R	326	0.316	0.355
E	K	327	0.373	0.073
B	T	328	0.226	0.353
B	H	329	0.175	0.364
E	T	330	0.364	-0.228
E	G	331	0.569	-1403
E	E	332	0.509	0.222
E	K	333	0.454	0.742
E	P	334	0.378	-0.502
B	Y	335	0.167	0.641
E	K	336	0.59	1929
B	C	337	0.087	0.386
E	K	338	0.723	1064
E	D	339	0.547	1195
B	C	340	0.28	0.051
E	G	341	0.406	-0.218
E	R	342	0.375	0.071
B	A	343	0.295	0.022
B	F	344	0.094	-0.222
E	T	345	0.379	-0.342
E	V	346	0.404	-0.409
E	S	347	0.469	0.085
E	S	348	0.325	-1230
E	C	349	0.412	0.578
B	L	350	0.084	0.153
E	S	351	0.39	1132
E	Q	352	0.452	1532
B	H	353	0.149	0.335
B	M	354	0.247	0.515
E	K	355	0.337	0.027
B	I	356	0.201	0.691
B	H	357	0.166	0.258
B	V	358	0.315	-0.421
E	G	359	0.541	-1545
E	E	360	0.532	0.035
E	K	361	0.432	0.641
E	P	362	0.398	-0.428
B	Y	363	0.171	0.643
E	E	364	0.588	1958
B	C	365	0.086	0.36
E	K	366	0.713	1209
E	E	367	0.534	1342
B	C	368	0.245	0.059
E	G	369	0.365	0.082
E	I	370	0.404	0.409
B	A	371	0.325	0.125
B	F	372	0.089	0.122
E	T	373	0.353	-0.262
E	R	374	0.437	-0.426
E	S	375	0.472	-0.073
E	S	376	0.328	-1093
E	Q	377	0.397	0.293
B	L	378	0.077	-0.425
E	T	379	0.412	1031
E	E	380	0.469	1408
B	H	381	0.167	-0.187
E	L	382	0.31	0.409
E	K	383	0.368	-0.078
B	T	384	0.227	0.459
B	H	385	0.193	0.148
B	T	386	0.335	-0.404
E	A	387	0.529	-1476
E	K	388	0.467	0.018
E	D	389	0.439	0.563
E	P	390	0.387	-0.45
B	F	391	0.17	0.716
E	E	392	0.587	1981
B	C	393	0.072	0.122
E	K	394	0.718	1241
E	I	395	0.547	1318
B	C	396	0.241	0.168
E	G	397	0.369	-0.064
E	K	398	0.378	0.318
B	S	399	0.308	0.147
B	F	400	0.101	0.041
E	R	401	0.362	-0.329
E	N	402	0.409	-0.253
E	S	403	0.465	-0.138
E	S	404	0.369	-0.947
E	C	405	0.395	0.586
B	L	406	0.089	0.551
E	S	407	0.461	1322
E	D	408	0.494	1665
B	H	409	0.168	0.109
E	F	410	0.287	0.694
E	R	411	0.428	0.063
B	I	412	0.232	0.41
B	H	413	0.199	0.111
E	T	414	0.388	-0.268
E	G	415	0.566	-1629
E	I	416	0.474	0.355
E	K	417	0.454	0.561
E	P	418	0.382	-0.348
B	Y	419	0.171	0.587
E	K	420	0.596	1966
B	C	421	0.079	-0.132
E	K	422	0.707	1275
E	D	423	0.537	1477
B	C	424	0.232	0.183
E	G	425	0.336	0.058
E	K	426	0.398	0.411
B	A	427	0.338	0.104
B	F	428	0.097	0.4
E	T	429	0.365	-0.2
E	Q	430	0.424	-0.252
E	N	431	0.504	0.048
E	S	432	0.365	-0.94
E	D	433	0.428	0.489
B	L	434	0.08	-0.533
E	T	435	0.418	1177
E	K	436	0.461	1558
B	H	437	0.17	0.001
E	A	438	0.283	0.626
E	R	439	0.398	-0.123
B	T	440	0.26	0.502
B	H	441	0.209	-0.052
E	S	442	0.364	-0.347
E	G	443	0.512	-1623
E	E	444	0.483	0.044
E	R	445	0.475	0.674
E	P	446	0.39	-0.506
B	Y	447	0.18	0.79
E	E	448	0.588	1902
B	C	449	0.075	0.255
E	K	450	0.728	1399
E	E	451	0.547	1594
B	C	452	0.201	0.14
E	G	453	0.31	0.186
E	K	454	0.416	0.374
B	A	455	0.32	0.408
B	F	456	0.085	-0.012
E	A	457	0.35	-0.086
E	R	458	0.444	-0.131
E	S	459	0.464	0.322
E	S	460	0.33	-1100
E	R	461	0.406	0.56
B	L	462	0.08	-0.68
E	S	463	0.425	1262
E	E	464	0.486	1517
B	H	465	0.186	0.18
E	T	466	0.328	0.477
E	R	467	0.416	-0.114
B	T	468	0.257	0.557
B	H	469	0.204	0.013
E	T	470	0.382	-0.25
E	G	471	0.546	-1504
E	E	472	0.538	0.036
E	K	473	0.448	0.634
E	P	474	0.423	-0.254
B	F	475	0.164	0.783
E	E	476	0.591	2011
B	C	477	0.075	0.241
E	V	478	0.721	1413
E	K	479	0.545	1567
B	C	480	0.23	0.374
E	G	481	0.343	0.109
E	K	482	0.433	0.352
B	A	483	0.328	0.233
B	F	484	0.107	0.047
E	A	485	0.404	-0.266
E	I	486	0.435	-0.157
E	S	487	0.467	0.231
E	S	488	0.369	-0.763
E	N	489	0.4	0.658
B	L	490	0.074	-0.111
E	S	491	0.443	1330
E	G	492	0.493	1529
B	H	493	0.177	-0.007
E	L	494	0.292	0.507
E	R	495	0.402	-0.121
B	I	496	0.277	0.431
B	H	497	0.178	0.058
E	T	498	0.357	-0.35
E	G	499	0.524	-1609
E	E	500	0.492	0.023
E	K	501	0.443	0.586
E	P	502	0.4	-0.419
B	F	503	0.17	0.683
E	E	504	0.57	1919
B	C	505	0.072	0.143
E	L	506	0.697	1175
E	E	507	0.536	1411
B	C	508	0.211	0.382
E	G	509	0.33	-0.1
E	K	510	0.361	0.341
B	A	511	0.285	0.083
B	F	512	0.09	0.289
E	T	513	0.345	-0.316
E	H	514	0.435	-0.491
E	S	515	0.48	-0.131
E	S	516	0.373	-0.961
E	S	517	0.429	0.458
B	L	518	0.083	0.139
E	N	519	0.41	1089
E	N	520	0.484	1506
B	H	521	0.182	0.123
E	M	522	0.313	0.36
E	R	523	0.384	0.079
B	T	524	0.279	0.472
B	H	525	0.195	0.131
E	S	526	0.358	-0.365
E	A	527	0.54	-1662
E	K	528	0.54	0.011
E	K	529	0.454	0.587
E	P	530	0.401	-0.477
B	F	531	0.168	0.79
E	T	532	0.579	1899
B	C	533	0.08	0.21
E	M	534	0.734	1240
E	E	535	0.509	1310
B	C	536	0.228	0.377
E	G	537	0.363	0.067
E	K	538	0.401	0.506
B	A	539	0.313	0.028
B	F	540	0.085	0.265
E	K	541	0.344	-0.465
E	F	542	0.449	-0.31
E	P	543	0.474	0.007
E	T	544	0.333	-1212
E	C	545	0.404	0.386
B	V	546	0.081	-0.161
E	N	547	0.417	1189
E	L	548	0.48	1479
B	H	549	0.169	0.024
E	M	550	0.325	0.477
E	R	551	0.393	-0.056
B	I	552	0.254	0.563
B	H	553	0.183	0.199
E	T	554	0.359	-0.428
E	G	555	0.524	-1587
E	E	556	0.498	-0.058
E	K	557	0.446	0.5
E	P	558	0.397	-0.58
B	Y	559	0.181	0.777
E	K	560	0.574	1835
B	C	561	0.073	0.041
E	K	562	0.704	1375
E	Q	563	0.556	1475
B	C	564	0.212	0.455
E	G	565	0.338	0.09
E	K	566	0.431	0.452
B	S	567	0.328	0.041
B	F	568	0.09	0.184
E	S	569	0.349	-0.275
E	Y	570	0.458	-0.412
E	S	571	0.502	0.06
E	N	572	0.372	-0.931
E	S	573	0.446	0.5
B	F	574	0.095	0.337
E	Q	575	0.442	1229
E	L	576	0.497	1407
B	H	577	0.181	-0.007
E	E	578	0.315	0.426
E	R	579	0.384	0.032
B	T	580	0.277	0.38
B	H	581	0.194	0.153
E	T	582	0.4	-0.365
E	G	583	0.553	-1693
E	E	584	0.489	0.087
E	K	585	0.486	0.668
E	P	586	0.372	-0.522
B	Y	587	0.186	0.796
E	E	588	0.584	1825
B	C	589	0.089	0.421
E	K	590	0.707	1341
E	E	591	0.556	1582
B	C	592	0.242	0.115
E	G	593	0.363	0.128
E	K	594	0.434	0.368
B	A	595	0.307	-0.087
B	F	596	0.092	0.124
E	S	597	0.343	-0.325
E	S	598	0.455	-0.342
E	S	599	0.441	-0.06
E	S	600	0.388	-1103
E	S	601	0.392	0.256
B	F	602	0.08	-0.414
E	R	603	0.436	1077
E	N	604	0.522	1500
B	H	605	0.194	0.164
E	E	606	0.296	0.601
E	R	607	0.47	0.098
B	R	608	0.29	0.538
B	H	609	0.195	0.218
E	A	610	0.381	-0.424
E	D	611	0.555	-1178
E	E	612	0.572	0.259
E	R	613	0.425	0.712
E	L	614	0.393	-0.907
E	S	615	0.312	-0.303
E	A	616	0.756	-0.907
